# Supplementary material for: HMGB1, a pathogenic molecule that induces neurite degeneration via TLR4-MARCKS, is a potential therapeutic target for Alzheimer’s disease
Source: PubMed Central journal article supplement (PMC4997258; doi:10.1038/srep31895), 2016-08-25

# **HMGB1, a pathogenic molecule that induces neurite degeneration via TLR4-MARCKS, is a potential therapeutic target for Alzheimer's disease**

**Kyota Fujita<sup>1,§</sup>, Kazumi Motoki<sup>1,§</sup>, Kazuhiko Tagawa<sup>1,§</sup>, Xigui Chen<sup>1</sup>, Hiroshi Hama<sup>2</sup>, Kazuyuki Nakajima<sup>3</sup>, Hidenori Homma<sup>1</sup>, Takuya Tamura<sup>1</sup>, Hirohisa Watanabe<sup>4</sup>, Masahisa Katsuno<sup>4</sup>, Chiemi Matsumi<sup>5</sup>, Masunori Kajikawa<sup>5</sup>, Takashi Saito<sup>6</sup>, Takaomi Saido<sup>6</sup>, Gen Sobue<sup>4</sup>, Atsushi Miyawaki<sup>2</sup> and Hitoshi Okazawa<sup>1,7,#</sup>**

- 1: Department of Neuropathology, Medical Research Institute, Tokyo Medical and Dental University, 1-5-45 Yushima, Bunkyo-ku, Tokyo 113-8510, Japan
- 2: Laboratory for Cell Function Dynamics, Brain Science Institute, RIKEN, 2-1 Hirosawa, Wako, Saitama 351-0198, Japan
- 3: Department of Bioinformatics, Institute of Bioinformatics, Soka university, 1-236 Tangi-machi, Hachioji, Tokyo 192-8577, Japan
- 4: Department of Neurology, Nagoya University Graduate School of Medicine, 65 Tsurumai-cho, Showa-ku, Nagoya 466-8550, Japan
- 5: Medical and Biological Laboratories Co., LTD. 4-5-3 Sakae, Naka-ku, Nagoya 460-0008, Japan
- 6: Laboratory for Proteolytic Neuroscience, Brain Science Institute, RIKEN, 2-1 Hirosawa, Wako, Saitama 351-0198, Japan
- 7: Center for Brain Integration Research, Tokyo Medical and Dental University, 1-5-45 Yushima, Bunkyo-ku, Tokyo 113-8510, Japan

§: KF, KM, KT are co-first authors

#: corresponding author

E-mail: [okazawa-tyk@umin.ac.jp](mailto:okazawa-tyk@umin.ac.jp)

## **Supplementary Figure Legends**

### **Supplementary Figure 1**

#### **Region-specific distribution of pSer46-MARCKS in 5xFAD mice**

The distribution of Ser46-phosphorylation of MARCKS was examined in the brains of 5xFAD mice at 6 months of age (upper panels). Plaque-like stains of pSer46-MARCKS were found in 5xFAD mice but not in wild type mice (B6/SJL). Staining was not found in the cerebellum of 5xFAD mice, consistent with the cerebrum-dominant pathology of AD. Another antibody against pThr143-MARCKS did not show the plaque-like patterns (lower panels).

### **Supplementary Figure 2**

#### **Specificity of the anti-pSer46-MARCKS antibody**

The specificity of anti-pSer46-MARCKS antibody was evaluated together with a commercial anti-MARCKS antibody (Santa Cruz Biotechnology) using lysates of HeLa cells expressing EGFP (negative control), MARCKS-EGFP (positive control) and EGFP-MARCKS (positive control). Both antibodies detected specific bands of MARCKS-EGFP (red arrow) and EGFP-MARCKS (blue arrow), whereas the two antibodies commonly reacted with non-specific bands (black arrows). One non-specific band was additionally detected by the anti-pSer46-MARCKS antibody (asterisk). Specific bands but not non-specific bands were absorbed by the phospho-MARCKS peptide used for generation of the antibody at 1:30 and 1:300 molar ratios between the phospho-MARCKS antibody and the phospho-MARCKS synthetic peptide.

### **Supplementary Figure 3**

#### **Relationship between pSer46-MARCKS staining and A $\beta$ aggregation in the cerebral cortex of 5xFAD mice**

(a) Images of co-stained brain tissues acquired by confocal fluorescence microscopy were further analysed using software (Imaris, Zeiss), and 3D images were generated. Three representative regions are shown. Blue and red enclosures indicate that the images are used for Figure 2B and enlarged images in Sup Figure 3 in the following.

**(b)** Two enlarged images from Sup Figure 3A. pSer46-MARCKS stains surrounded but not merged with A $\beta$  aggregation.

**(c)** A representative image showing the connection between MAP2 and pSer46-MARCKS stains.

#### **Supplementary Figure 4**

##### **Relationship between pSer46-MARCKS staining and A $\beta$ aggregation in the cerebral cortex of PS1 mutant (M146L) human patients**

**(a)** Images of the cerebral cortex of human PS1-linked AD patients were analysed similarly. Three representative regions are shown. The blue enclosure indicates that the images are used for Figure 2C.

**(b)** A representative image showing the connection between tau and pSer46-MARCKS staining.

#### **Supplementary Figure 5**

##### **Relationship between pSer46-MARCKS staining and A $\beta$ aggregation in the transparent brain of human APP knock-in mice**

The forebrains of human mutant APP knock-in mice were made transparent by the ScaleS method and subjected to immunohistochemistry of A $\beta$ , pSer46-MARCKS and synapsin.

#### **Supplementary Figure 6**

##### **Relationship between pSer46-MARCKS staining and two types of glia or neurons**

**(a)** Images were obtained from the retrosplenial dysgranular cortex of 5xFAD mice co-stained with microglia- or astrocyte-specific markers. Phosphorylation of MARCKS at Ser46 did not occur in the microglia or astrocytes.

**(b)** Co-staining of NeuN, a neuronal marker, and pSer46-MARCKS revealed that phosphorylation of MARCKS at Ser46 occurred in the neurons, which were surrounded by pSer46-MARCKS-positive degenerative neurites. Groups 1, 2, and 3 are tentatively classified from the hypothetical progression. Group 1 is the first stage, Group 2 loses viability of neurons and reactivity of NeuN, and in Group 3

### **Supplementary Figure 7**

#### **Effect of Ser46-MARCKS phosphorylation on the interaction with actin**

The interaction between MARCKS and actin affects dendritic spine morphology<sup>14</sup>. Phosphorylated mimics of full-length MARCKS-EGFP (S46D and S46E) lost the high affinity to actin, whereas a non-phosphorylated form of full-length MARCKS-EGFP (S46A) preserved the high affinity.

### **Supplementary Figure 8**

#### **Candidate kinases phosphorylating MARCKS at Ser46**

- (a) NetworkKIN 3.0 was used to predict candidate kinases that phosphorylate MARCKS at Ser46. The top three include ERK1/2 and PKC mu.
- (b) Summary of the mass spectrometric analysis of *in vitro* phosphorylation of the GST-MARCKS (1-176 aa) peptide by each kinase.

### **Supplementary Figure 9**

#### **Dynamism of HMGB1 in neurons with intracellular A $\beta$ accumulation and after the rupture**

- (a) Co-staining of HMGB1 and A $\beta$  revealed that cytoplasmic translocation of HMGB1 occurred in neurons with intracellular A $\beta$  accumulation in the cerebral cortex of 5xFAD mice. Magnifications of fields #1-3 are shown in the lower panels. Field #2 might be an earlier phenotype than #3 based on the amount and distribution of intracellular A $\beta$ . The graph shows quantification of cytoplasmic HMGB1-positive cells.
- (b) HMGB1 did not bind to the ghost cells or extracellular A $\beta$  aggregations.
- (c) Three-dimensional images of the same visual field (arrowhead) also confirmed the findings.

### **Supplementary Figure 10**

#### **Chronological changes of MARCKS phosphorylation during ageing of 5xFAD mice**

- (a) Low magnification of sagittal sections of 5xFAD and wild type (B6/SJL) mice stained with an anti-pSer46-MARCKS antibody. At 3 and 6 months of age, the

plaque-like pattern of staining was detected. At 1 month of age (when not aggregated in the extracellular space), the plaque-like stains were not present, whereas fibril-like stains of pSer46-MARCKS were detected.

**(b)** Co-staining with A $\beta$  revealed that the fibril-like stains at 1 month correspond to neural fibres among the cells. Moreover, the cytoplasm of neurons without intracellular A $\beta$  was stained with pSer46-MARCKS, suggesting that a specific extracellular trigger rather than an intracellular trigger of A $\beta$  was critical for MARCKS phosphorylation at Ser46.

### **Supplementary Figure 11**

#### **HMGB1 activates MARCKS phosphorylation at Ser46 through TLR4**

**(a)** Time-dependent response of MARCKS phosphorylation at Ser46 after addition of 5 nM HMG to the culture medium of primary mouse cortical neurons prepared from the E15 embryonic cerebral cortex. Quantitative analyses are shown in graphs for MARCKS/GAPDH, pSer46-MARCKS/MARCKS and pSer46-MARCKS/GAPDH.

**(b)** HMGB1 dose-dependent response of MARCKS phosphorylation at Ser46 in mouse primary cortical neurons (E15). The responses were evaluated 180 minutes after the addition of HMGB1 to the culture medium. Quantitative analyses are shown in the graphs.

**(c)** The response of MARCKS phosphorylation at Ser46 was specific to HMGB1. Addition of BDNF did not induce MARCKS phosphorylation.

**(d)** Effects of various A $\beta$  species on MARCKS phosphorylation at Ser46. A $\beta$  monomers, oligomers and aggregates were added at 25 nM to the medium of the primary mouse cortical neurons. Slight activation was observed only with the A $\beta$  oligomer.

**(e)** A mixture of HMGB1 and A $\beta$  triggered MARCKS phosphorylation at Ser46.

**(f)** Similar MARCKS phosphorylation at Ser46 was induced by a TLR4 agonist (LPS-EB).

**(g)** HMGB1-induced MARCKS phosphorylation at Ser46 was blocked by a TLR4 antagonist (LPS-RS).

**(h)** HMGB1-induced MARCKS phosphorylation at Ser46 was blocked by knockdown of TLR4 with shRNA.

## **Supplementary Figure 12**

### **Selection of the best anti-HMGB1 antibody**

**(a, b)** Seven clones of the anti-HMGB1 antibody were compared for their affinity to HMGB1. ELISA **(a)** and surface plasmon resonance (SPR) analysis **(b)** were used to evaluate the affinity of antibodies to HMGB1. We selected the clone 2C8C because it showed relatively high affinity in both the ELISA and SPR analyses.

## **Supplementary Figure 13**

### **Transfer of the antibody from subcutaneous injection to the brain tissue**

**(a)** To evaluate the efficiency of a subcutaneous injection (SC) in delivering the antibody to the brain, we injected biotin-labelled IgG using a similar method to that of the anti-HMGB1 antibody and examined the concentrations in blood plasma and in brain tissues. Some of the injected IgG (0.008%) was present in the brain tissue that had been prepared after systemic perfusion with PBS.

**(b)** Immunohistochemistry with avidin-HRP and DAB colour development was performed to detect biotin-labelled mouse IgG in the brain tissues, but no definite signal was detected.

## **Supplementary Figure 14**

### ***In vivo* effects of the subcutaneous injection of the anti-HMGB1 antibody on MARCKS phosphorylation at Ser46 and on A $\beta$ plaque formation**

**(a)** In both groups of 5xFAD mice that had received subcutaneous injection of the anti-HMGB1 monoclonal antibody during 1-6 or 3-6 months, the signal intensity of the plaque-like stain pattern of pSer46-MARCKS was substantially decreased compared to the group that had received a subcutaneous injection of non-specific IgG (upper panels). The number of A $\beta$  plaques was mildly decreased by subcutaneous injection of the anti-HMGB1 monoclonal antibody (lower panels). The inlays show a few plaque-like stains.

**(b)** A $\beta$  signal intensity in immunohistochemistry by DAB colour development also confirmed that A $\beta$  plaques were mildly decreased by subcutaneous injection of the anti-HMGB1 monoclonal antibody. The lower graphs show the

effect of anti-HMGB1 monoclonal antibody on the number and area of A $\beta$  plaques.

**(c)** In contrast to immunohistochemistry, Western blot analysis revealed a reduction in the total amount of A $\beta$  by the anti-HMGB1 monoclonal antibody (upper panels), especially oligomers and protofibrils (lower graph).

**(d)** Western blot analysis revealed that the anti-HMGB1 monoclonal antibody decreased pSer46-MARCKS and  $\gamma$ H2AX, a DNA damage marker.

**(e)** Western blot and qPCR analyses showed that human APP gene expression was not changed by anti-HMGB1 monoclonal antibody.

### **Supplementary Figure 15**

#### **Experimental conditions for *in vitro* A $\beta$ aggregation**

**(a)** Experimental conditions for *in vitro* A $\beta$  aggregation are shown in the scheme. Sampling was performed before and after incubation.

**(b)** Western blot analysis of *in vitro* A $\beta$  aggregation. Two types of sample buffer were tested, and six conditions were tested. We chose one condition (incubation at 37°C for 48 hours) because additional incubation did not affect the aggregation, and we used mercaptoethanol (-) sample buffer for further analyses.

**(c)** Electron microscopic analysis of *in vitro* A $\beta$  aggregation also revealed that the condition was suitable for further analyses.

### **Supplementary Figure 16**

#### ***In vitro* effects of HMGB1 and anti-HMGB1 antibody on A $\beta$ polymerization, A $\beta$ oligomerization, A $\beta$ -HMGB1 heteromer formation and HMGB1 oligomerization**

**(a)** A $\beta$  was incubated for 48 hours with or without HMGB1 and with or without the HMGB1 antibody. Normal mouse IgG was used as a control. HMGB1 notably decreased fibrils/aggregates of A $\beta$  and increased the other types of A $\beta$  species, such as monomers, oligomers and ADDLs/protofibrils. Further addition of the anti-HMGB1 antibody suppressed the HMGB1-induced decrease of A $\beta$  fibrils/aggregates and inhibited the HMGB1-induced increase of A $\beta$  oligomers and ADDLs/protofibrils.

(b) Quantitative analysis of ratios among four types of A $\beta$  species in the total WB signals of A $\beta$  (IgG signals were excluded). Mean values of three experiments were used.

(c) The effects of HMGB1 and the anti-HMGB1 antibody on A $\beta$  oligomerization were further investigated. HMGB1 clearly increased the A $\beta$  monomer, oligomer and ADDLs/protofibrils in a dose-dependent manner. The anti-HMGB1 antibody but not the control IgG blocked the effect of HMGB1 on A $\beta$  oligomerization.

(d) Using the same sample, *in vitro* polymerization of HMGB1 was detected. A $\beta$  inhibited the HMGB1 polymerization and produced other types of A $\beta$ -HMGB1 heteromers as determined by their molecular weight.

(e) In the absence of A $\beta$ , HMGB1 aggregation was promoted in a dose-dependent manner. The anti-HMGB1 antibody inhibited HMGB1 polymerization and increased the ratio of HMGB1 monomers and dimers. This effect was not observed with the control IgG.

(f) Electron microscopic observation of *in vitro* aggregation samples. HMGB1 blocked fibril formation of A $\beta$  (black arrows) and increased amorphous structures that might correspond to A $\beta$  oligomers or ADDLs/protofibrils. Addition of the anti-HMGB1 antibody recovered fibril formation (black arrows). Immunoelectron microscopy revealed that HMGB1 was located in the periphery (white arrows), presumably blocking extension of the A $\beta$  fibrils.

### **Supplementary Figure 17**

#### ***In vivo* effect of the anti-HMGB1 monoclonal antibody on microglia in 5xFAD mice**

(a) Low magnification of the cerebral cortex (RSD) and high magnification of a representative A $\beta$  plaque of 5xFAD mice at 6 months of age are shown. After treatment with the anti-HMGB1 antibody (both the 1-6 months and 3-6 months treatment groups), a larger number of microglia formed A $\beta$  plaques, and the microglia incorporated A $\beta$  into the cytoplasm.

(b) Quantitative analysis of the number of microglia in a visual field (N=10, cerebral cortex) and the number of microglia forming plaques (N=30, cerebral cortex). Both values were increased in the mice after treatment with the anti-HMGB1 antibody.



**(c)** Phagocytosis of fluorescent A $\beta$  by rat microglia in primary cultures. TAMRA-A $\beta$ , human HMGB1 and anti-HMGB1 monoclonal antibodies were mixed, pre-incubated and added to the primary microglial culture (upper panel). Addition of the anti-HMGB1 monoclonal antibody enhanced phagocytosis of TAMRA-A $\beta$  ((middle photos)), and quantitative analysis confirmed the findings (lower graph).

### **Supplementary Figure 18**

#### **A $\beta$ species at high concentrations trigger the release of HMGB1 from neurons**

Monomers, oligomers and fibrils of A $\beta$  were added to the primary mouse cortical neuron cultures prepared from E15. After 3 hours, HMGB1 concentrations in the culture medium were examined by ELISA.

### **Supplementary Figure 19**

#### **Hypothetical mechanisms of the therapeutic effects of the anti-HMGB1 monoclonal antibody**

**(a)** Pathological status of AD focusing on A $\beta$  and HMGB1. **(b)** Ameliorated pathological status of AD after injection of the anti-HMGB1 monoclonal antibody.

### **Supplementary Video 1**

#### **3D movie of co-staining of pSer46-MARCKS staining and A $\beta$ in 6-month-old 5xFAD mice cortex.**

This movie corresponds to the image in figure 2B.

### **Supplementary Video 2**

#### **3D movie of co-staining of pSer46-MARCKS staining and A $\beta$ in human AD brain.**

This movie corresponds to the image in figure 2C.

### **Supplementary Video 3**

**Relationship between pSer46-MARCKS staining and A $\beta$  aggregation in the transparent brain of human APP knock-in mice.**

(a) This movie corresponds to the image of 8-month-old human APP knock-in mice brain in Supplementary figure 5B.

(b) This movie corresponds to the image of 17-month-old human APP knock-in mice brain in Supplementary figure 5B.

(c) This movie corresponds to the image of 20-month-old human APP knock-in mice brain in Supplementary figure 5B.

**Supplementary Video 4**

**3D movie of co-staining of pSer46-MARCKS staining and Tau in human AD brain.**

This movie corresponds to the image in figure 2D.

# Supplementary Figure 1

pMARCKS (S46 vs T143) IHC in 5xFAD mice; 6 month old

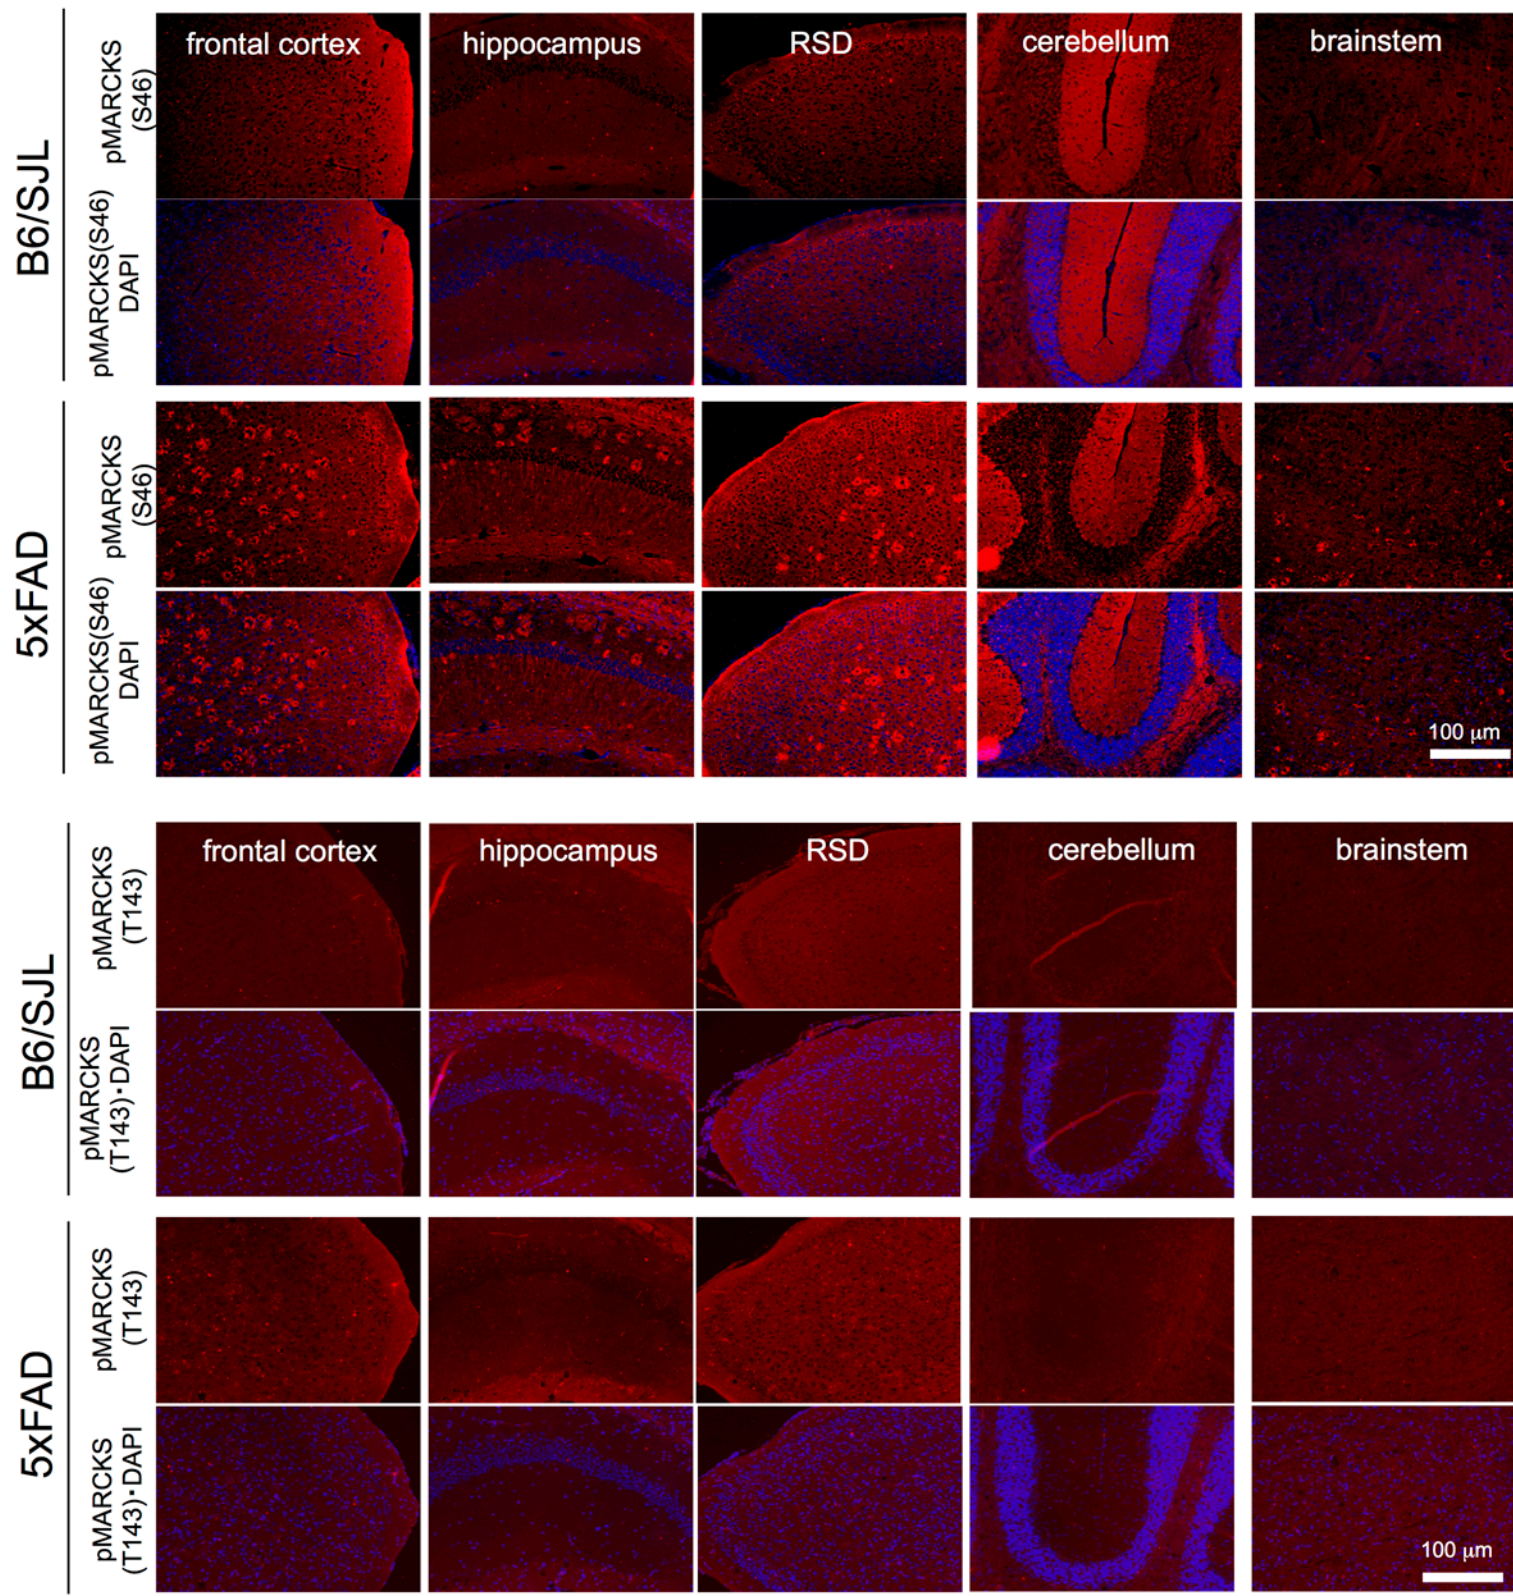

# Supplementary Figure 2

| Transfection to HeLa cells | Antibody       | Anti-MARCKS (SC) |   | Anti-pMARCKS (S46) |       |                     |   |   |   |
|----------------------------|----------------|------------------|---|--------------------|-------|---------------------|---|---|---|
|                            | Competitor     | (-)              |   | Phospho-peptide    |       | Non-phospho-peptide |   |   |   |
|                            | Ratio (molar)  | (-)              |   | 1:30               | 1:300 | 1:30                |   |   |   |
|                            |                | +                | - | +                  | -     | +                   | - | + | - |
|                            | EGFP           | +                | - | +                  | -     | +                   | - | + | - |
|                            | EGFP-MARCKS Wt | -                | + | -                  | +     | -                   | + | - | + |
|                            | MARCKS-EGFP Wt | -                | - | +                  | -     | -                   | + | - | + |

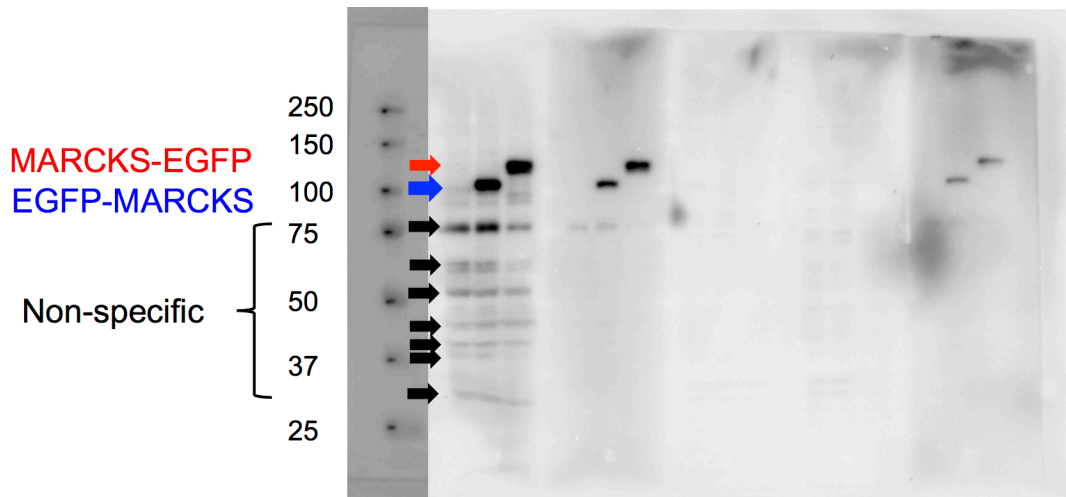

|                                                                                                            |                                                                                                                                                                                                                                                                              |
|------------------------------------------------------------------------------------------------------------|------------------------------------------------------------------------------------------------------------------------------------------------------------------------------------------------------------------------------------------------------------------------------|
| <p>SC:Anti-full-length MARCKS (SantaCrus)<br/>1/1000</p> <p>2<sup>nd</sup> Ab GE anti-Mouse<br/>1/3000</p> | <p>Anti-pMARCKS (S46) (Original Lot. RB5871)<br/>1/100,000</p> <p>Antigen sequence</p> <ol style="list-style-type: none"> <li>Phospho-peptide (ENGHVKVNGDA(pS)PA)</li> <li>Non-phospho-peptide (ENGHVKVNGDASPA)</li> </ol> <p>2<sup>nd</sup> Ab GE anti-Mouse<br/>1/3000</p> |
|------------------------------------------------------------------------------------------------------------|------------------------------------------------------------------------------------------------------------------------------------------------------------------------------------------------------------------------------------------------------------------------------|

# 5xFAD Mouse

## A $\beta$ and pS46-MARCKS

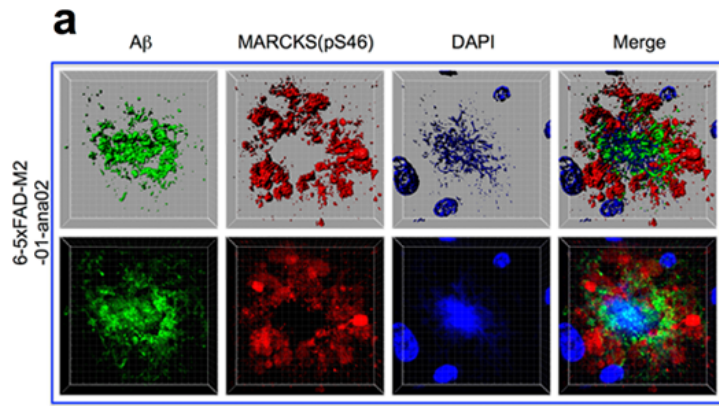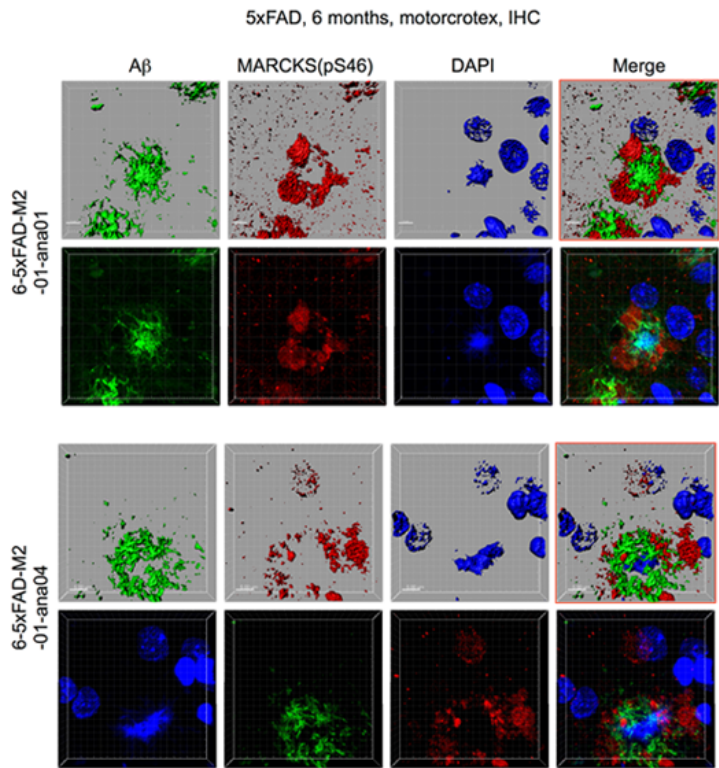

b1

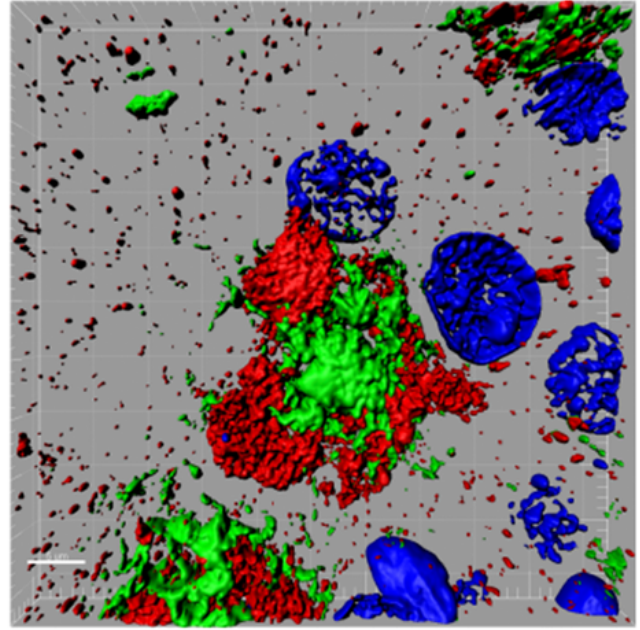

b2

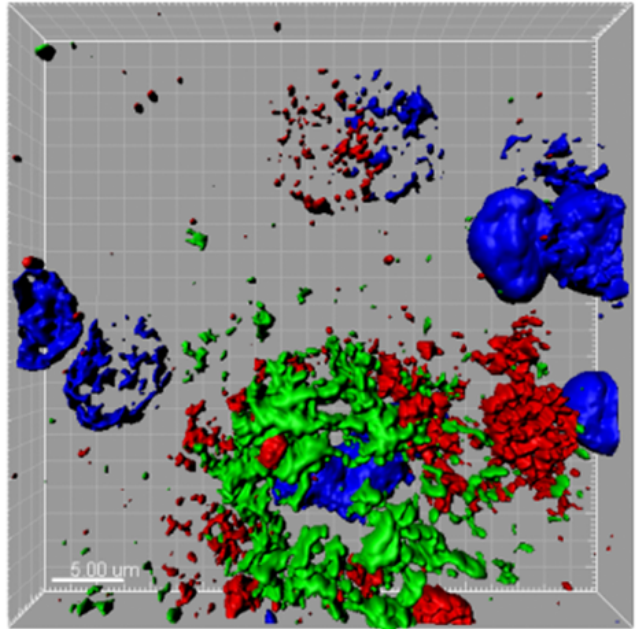

c

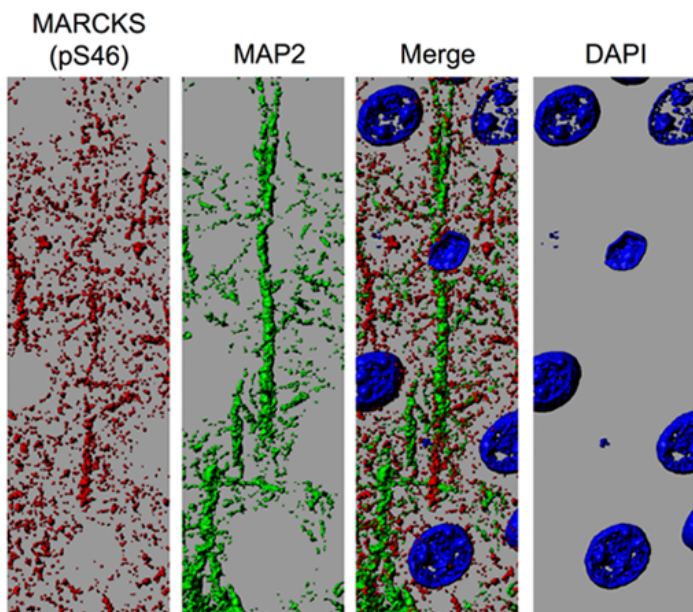



# Supplementary Figure 5

**a** 8 months old *App<sup>NL-F/NL-F</sup>* mouse

Alexa488- $\alpha$ Amyloid- $\beta$  mAb CF633- $\alpha$ Phospho-MARCKS pAb

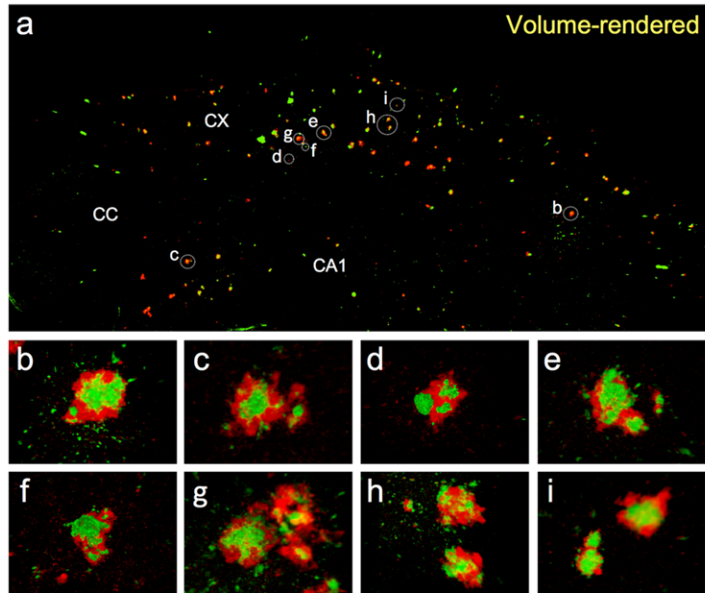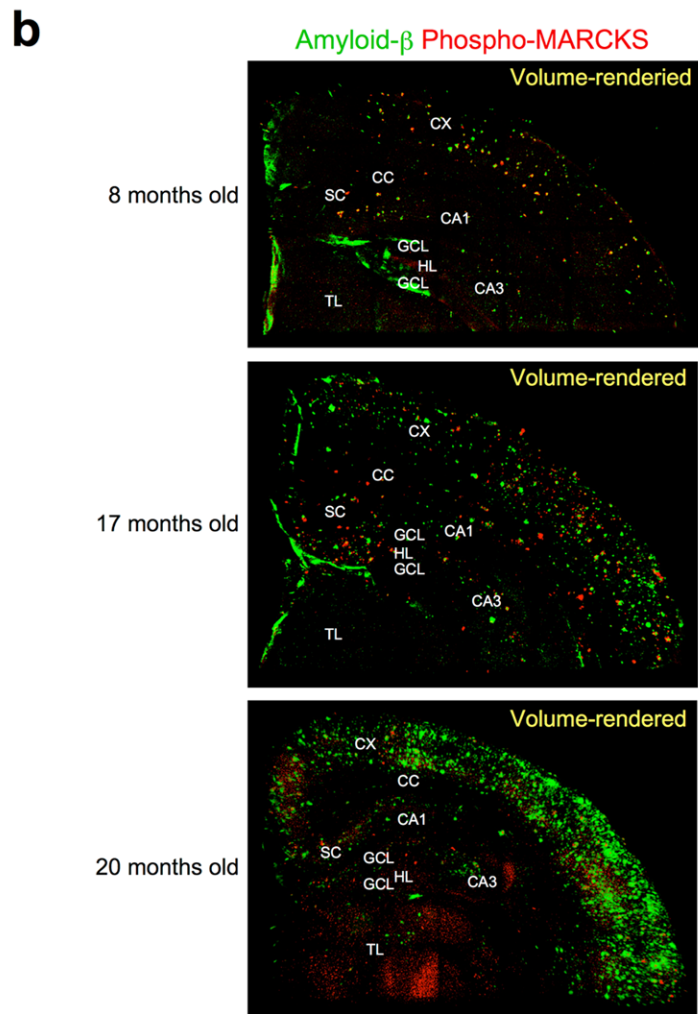

CC: corpus callosum, CX: cortex, GCL: granule cell layer, HL: hilus, SC: subiculum, TL: thalamus

## Supplementary Figure 6

### a

Ser46-phosphorylation of MARCKS does not occur in glia

5xFAD mice, 6 month, RSD

pMARCKS (S46)  
and microglia (MRF1)

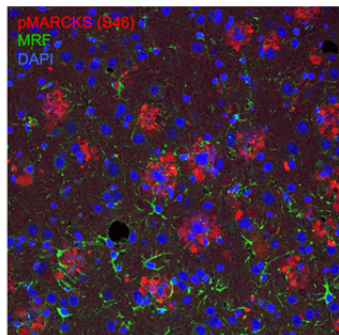

pMARCKS (S46)  
and astrocyte (GFAP)

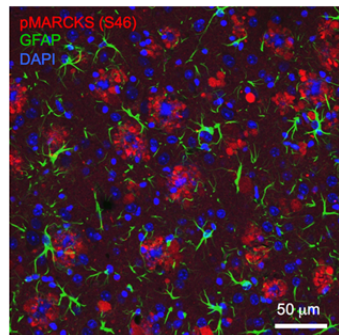

MRF: microglial response factor 1  
GFAP: glial fibrillary acidic protein

### b

Neurons exist in the center of plaques

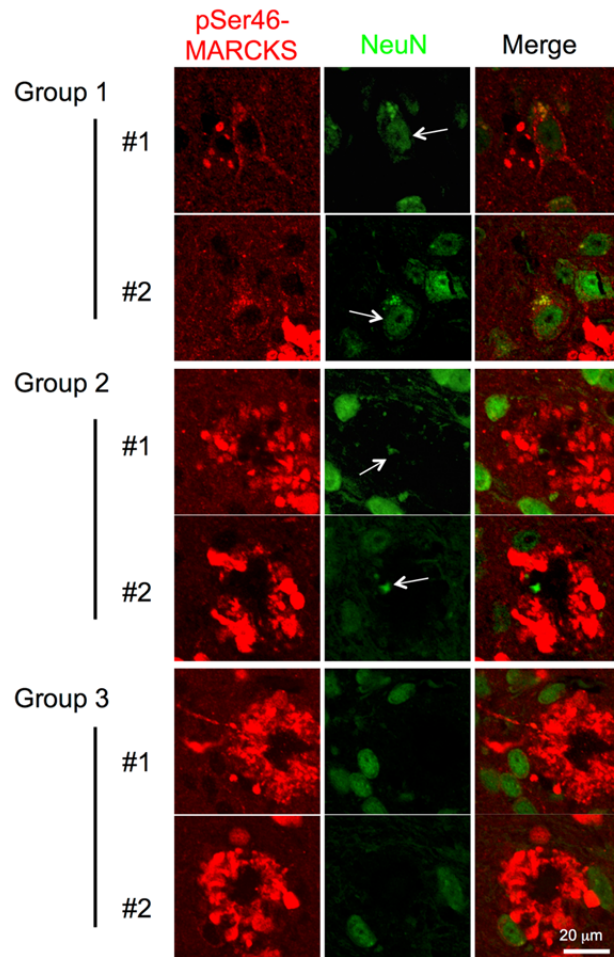



# Supplementary Figure 7

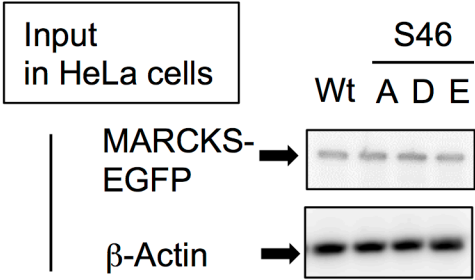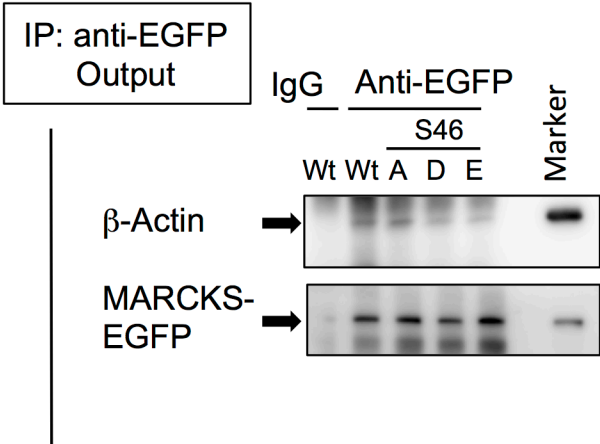

Tukey's HSD test  
 \*\*:p<0.01, \*:p<0.05  
 n=3

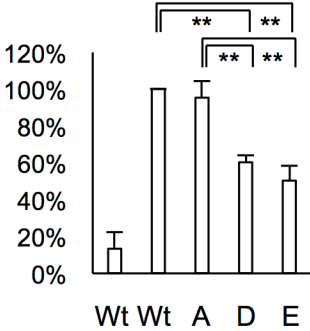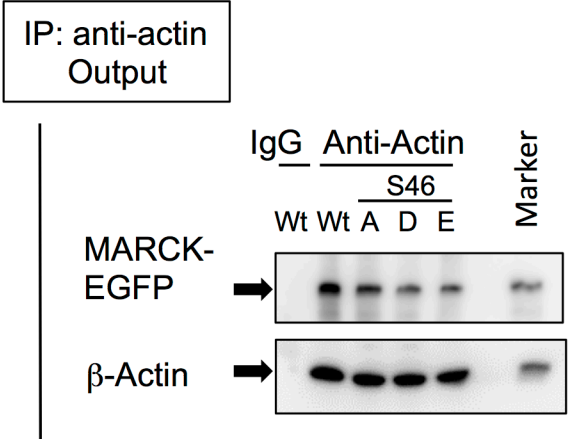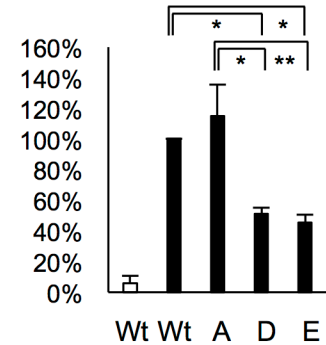

# Supplementary Figure 8

**a**

Networkin 3.0  
MARCKS S46  
string\_identifier : ENSP00000357624

| id        | Name   | networkin score | netphorest group            | netphorest score | string score |
|-----------|--------|-----------------|-----------------------------|------------------|--------------|
| MAPK1     | ERK2   | 3.06098         | MAPK3_MAPK1_MAPK7_NLK_group | 0.105618         | 0.818        |
| PKD1      | PKC-mu | 2.27591         | PKD_group                   | 0.039228         | 0.564        |
| MAPK3     | ERK1   | 0.983546        | MAPK3_MAPK1_MAPK7_NLK_group | 0.105618         | 0.407673     |
| MAPK12    | p38 γ  | 0.351341        | p38_group                   | 0.14822          | 0.234388     |
| MAPK13    | p38 δ  | 0.348053        | p38_group                   | 0.14822          | 0.209543     |
| MAPK11    | p38 β  | 0.347193        | p38_group                   | 0.14822          | 0.203048     |
| CDK1      |        | 0.332751        | CDK2_CDK3_CDK1_CDK5_group   | 0.074269         | 0.381842     |
| MAPK10    | JNK3   | 0.307479        | JNK_group                   | 0.121194         | 0.183229     |
| GSK3beta  |        | 0.295009        | GSK3_group                  | 0.044283         | 0.331011     |
| NLK       |        | 0.283417        | MAPK3_MAPK1_MAPK7_NLK_group | 0.105618         | 0.162954     |
| MRCKa     |        | 0.282431        | DMPK_group                  | 0.048257         | 0.372        |
| MAPK8     | JNK1   | 0.259509        | JNK_group                   | 0.121194         | 0.289365     |
| PKD3      |        | 0.258335        | PKD_group                   | 0.039228         | 0.36         |
| GSK3alpha |        | 0.232009        | GSK3_group                  | 0.044283         | 0.344139     |
| CDK3      |        | 0.224046        | CDK2_CDK3_CDK1_CDK5_group   | 0.074269         | 0.144787     |
| MOK       |        | 0.186607        | RCK_group                   | 0.042254         | 0.296768     |
| DMPK2     |        | 0.165869        | DMPK_group                  | 0.048257         | 0.124167     |
| DMPK1     |        | 0.165869        | DMPK_group                  | 0.048257         | 0.175951     |
| MRCkb     |        | 0.165869        | DMPK_group                  | 0.048257         | 0.063374     |
| CLK1      |        | 0.164885        | CLK_group                   | 0.043101         | 0.198142     |
| CLK2      |        | 0.164756        | CLK_group                   | 0.043101         | 0.15297      |
| CLK3      |        | 0.164756        | CLK_group                   | 0.043101         | 0.110813     |
| CLK4      |        | 0.164756        | CLK_group                   | 0.043101         | 0.108364     |
| ICK       |        | 0.164573        | RCK_group                   | 0.042254         | 0.141656     |
| MAK       |        | 0.164573        | RCK_group                   | 0.042254         | 0.12918      |
| HIPK1     |        | 0.164525        | HIPK1_HIPK2_group           | 0.042031         | 0.131697     |
| PKD2      |        | 0.164029        | PKD_group                   | 0.039228         | 0.156382     |
| CDK2      |        | 0.118088        | CDK2_CDK3_CDK1_CDK5_group   | 0.074269         | 0.345993     |
| CDK5      |        | 0.026452        | CDK2_CDK3_CDK1_CDK5_group   | 0.074269         | 0.326783     |
| MAPK9     | JNK2   | 0.000282        | JNK_group                   | 0.121194         | 0.312636     |
| DNAPK     |        | 0.000153        | DNAPK                       | 0.050934         | 0.288717     |
| MAPK7     | ERK5   | 0.000128        | MAPK3_MAPK1_MAPK7_NLK_group | 0.105618         | 0.345122     |
| HIPK2     |        | 0.000126        | HIPK1_HIPK2_group           | 0.042031         | 0.161236     |
| MAPK14    | p38 α  | 0.000103        | p38_group                   | 0.14822          | 0.313981     |

**b**

| Peptide detected by Mass Spec        | Precursor MZ | Precursor Charge | Retention Time | Peptide intensity |         |         |         |         | No kinase |
|--------------------------------------|--------------|------------------|----------------|-------------------|---------|---------|---------|---------|-----------|
|                                      |              |                  |                | ERK1              | ERK2    | JNK1    | JNK2    | JNK3    |           |
| Phosphorylated peptides at S46       |              |                  |                |                   |         |         |         |         |           |
| VN[Dea]GDAS[Pho]PAAAESGAK            | 713.298      | 2                | 22.7159        | 185.43            | 344.34  | 292.487 | 457.653 | 158.935 | 101.177   |
| VN[Dea]GDAS[Pho]PAAAESGAK[Frm]       | 727.296      | 2                | 23.2915        | 211.915           | 242.506 | 158.93  | 52.97   | 185.415 | 174.771   |
| AS[Pho]PAAAESGAK                     | 520.226      | 2                | 16.4778        | 105.96            | 79.47   | 79.47   | 52.97   | 105.94  | 52.98     |
| VN[Dea]GDAS[Pho]PAAAESGAK            | 704.293      | 2                | 24.1727        | 132.45            | 1117.64 | 2594.11 | 1438.6  | 1900.5  | 79.47     |
| VN[Dea]GDAS[Pho]PAAAESGAK[CEI]       | 749.309      | 2                | 24.4741        | 182.116           | 105.965 | 147.2   | 105.94  | 52.98   | 156.573   |
| VN[Dea]GD[NaX]AS[Pho]PAAAESGAK       | 724.289      | 2                | 22.0554        | 211.92            | 79.455  | 175.673 | 105.94  | 181.999 | 158.91    |
| VN[Dea]GD[XX]AS[Pho]PAAAESGAK        | 732.276      | 2                | 22.0775        | 211.92            | 185.395 | 175.673 | 132.43  | 52.98   | 105.94    |
| Non-phosphorylated peptides at Ser46 |              |                  |                |                   |         |         |         |         |           |
| VN[Dea]GDASPAAESGAK                  | 673.315      | 2                | 22.4476        | 79.44             | 185.395 | 271.496 | 264.89  | 278.1   | 638.338   |
| VN[Dea]GDAS[Pho]PAAAESGAK            |              |                  | P / non P      | 2.33              | 1.86    | 1.08    | 1.73    | 0.57    | 0.16      |
| Ratio compared to no kinase (folds)  |              |                  |                | 14.56             | 11.63   | 6.75    | 10.81   | 3.56    |           |

## Supplementary Figure 9

**a**

Cytoplasmic shift of HMGB1  
in neurons with intracellular A $\beta$

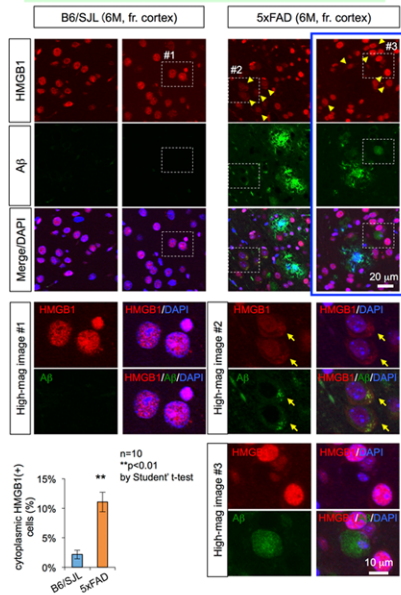

**b**

Amyloid beta remains around the ghost cells  
but HMGB1 dispersed from the dead cells

5xFAD mice (6M, fr. Cortex)

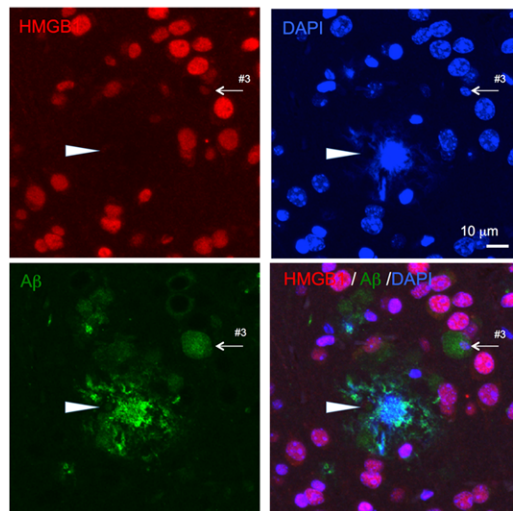

**c**

Amyloid beta remains around the ghost cells  
but HMGB1 dispersed from the dead cells

HMGB1 A $\beta$  DAPI

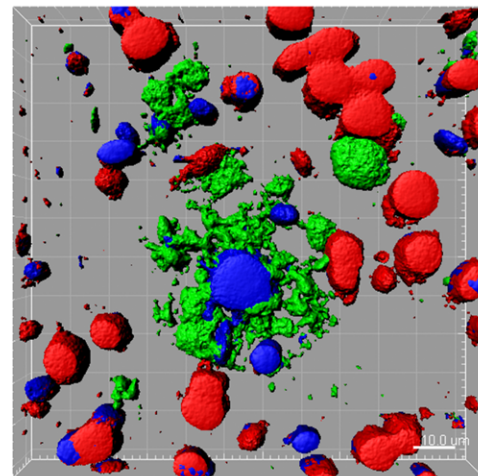

# Supplementary Figure 10

**a**

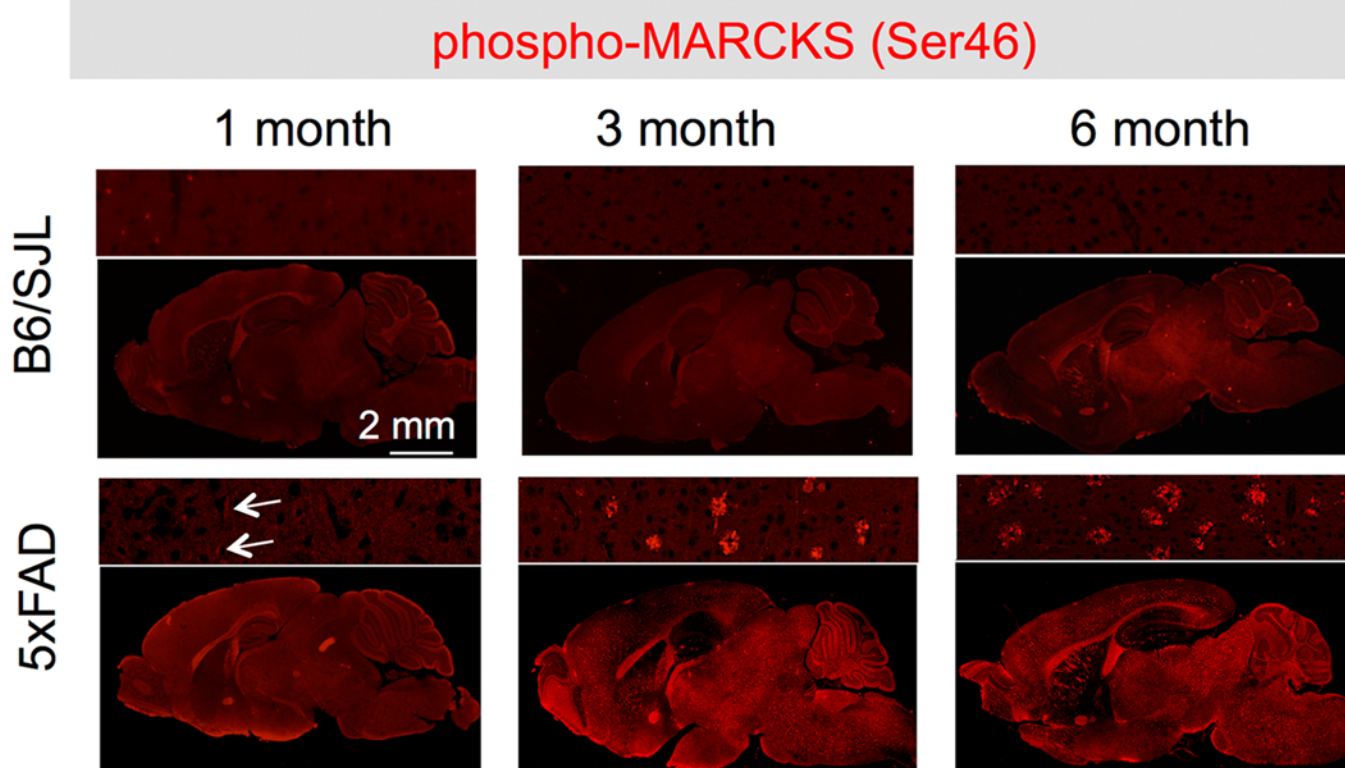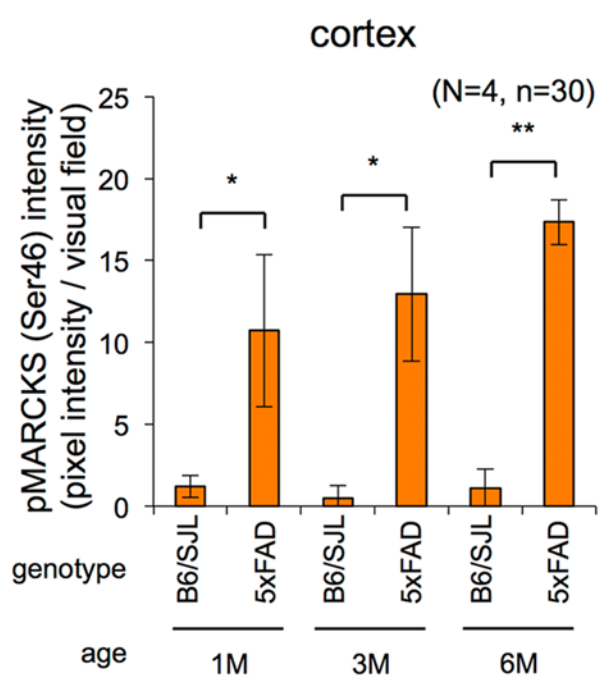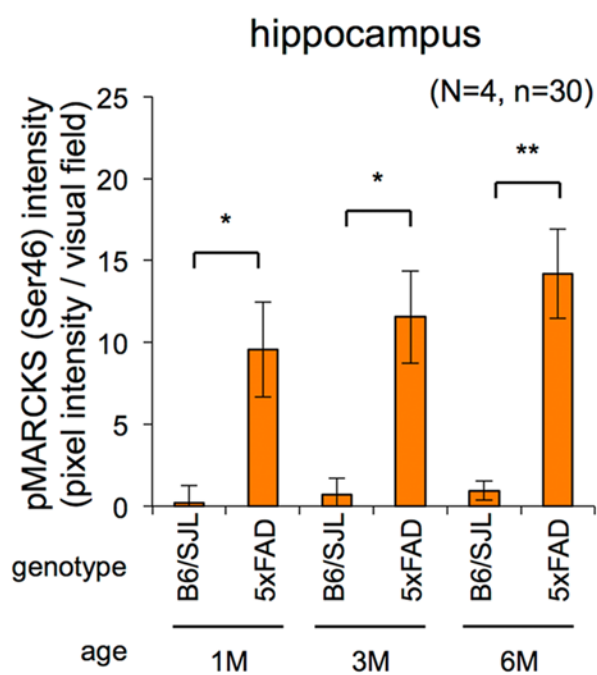

**b**

phospho-MARCKS (Ser46) and β-Amyloid

1 month 5xFAD

3 month 5xFAD

6 month 5xFAD

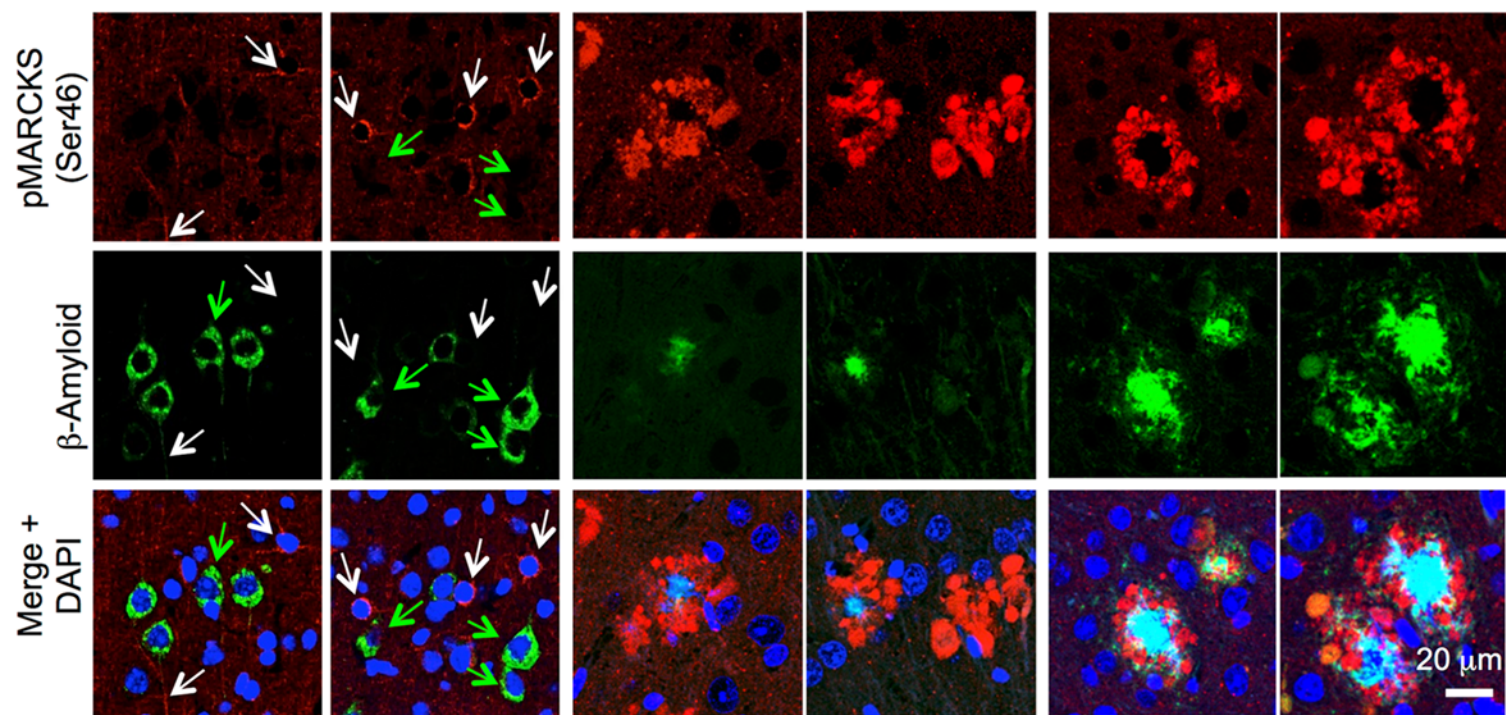

# Supplementary Figure 11

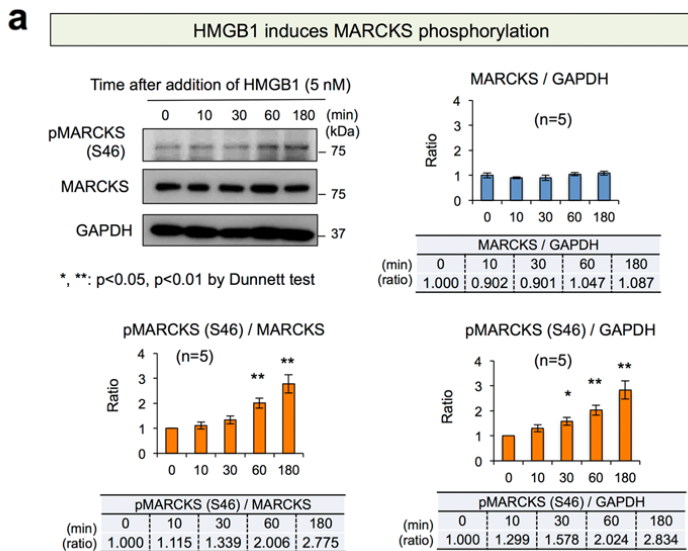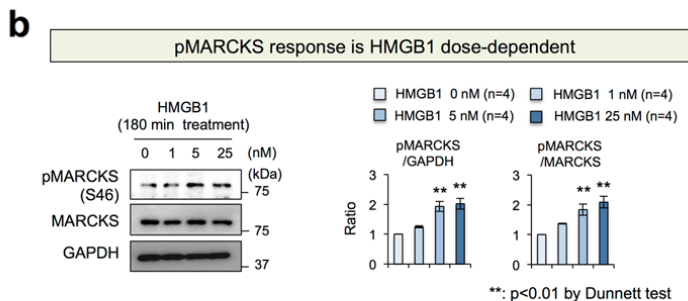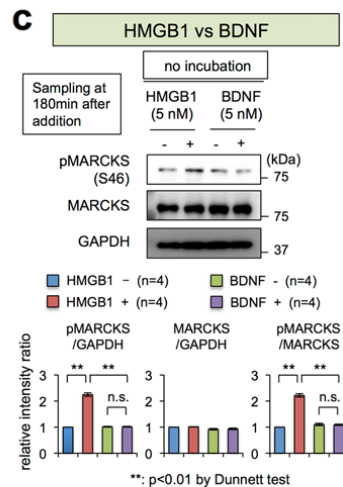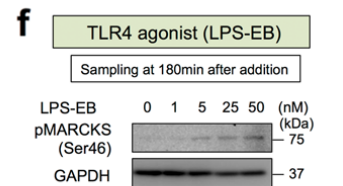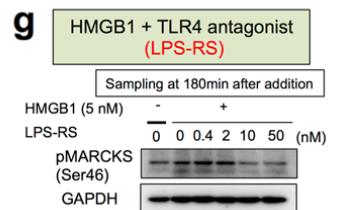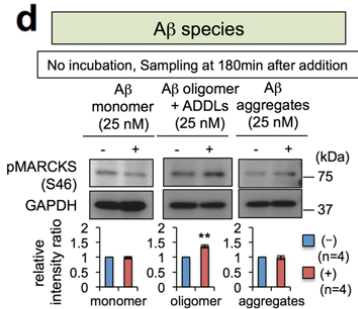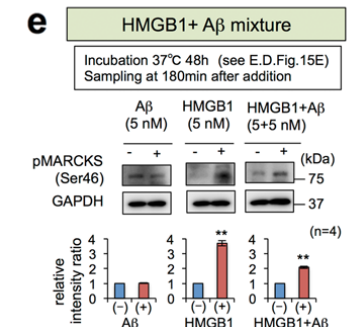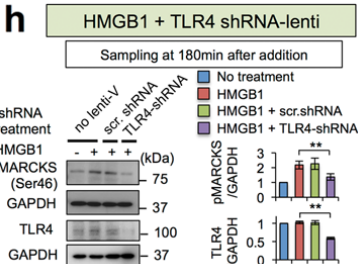

# Supplementary Figure 12

**a**

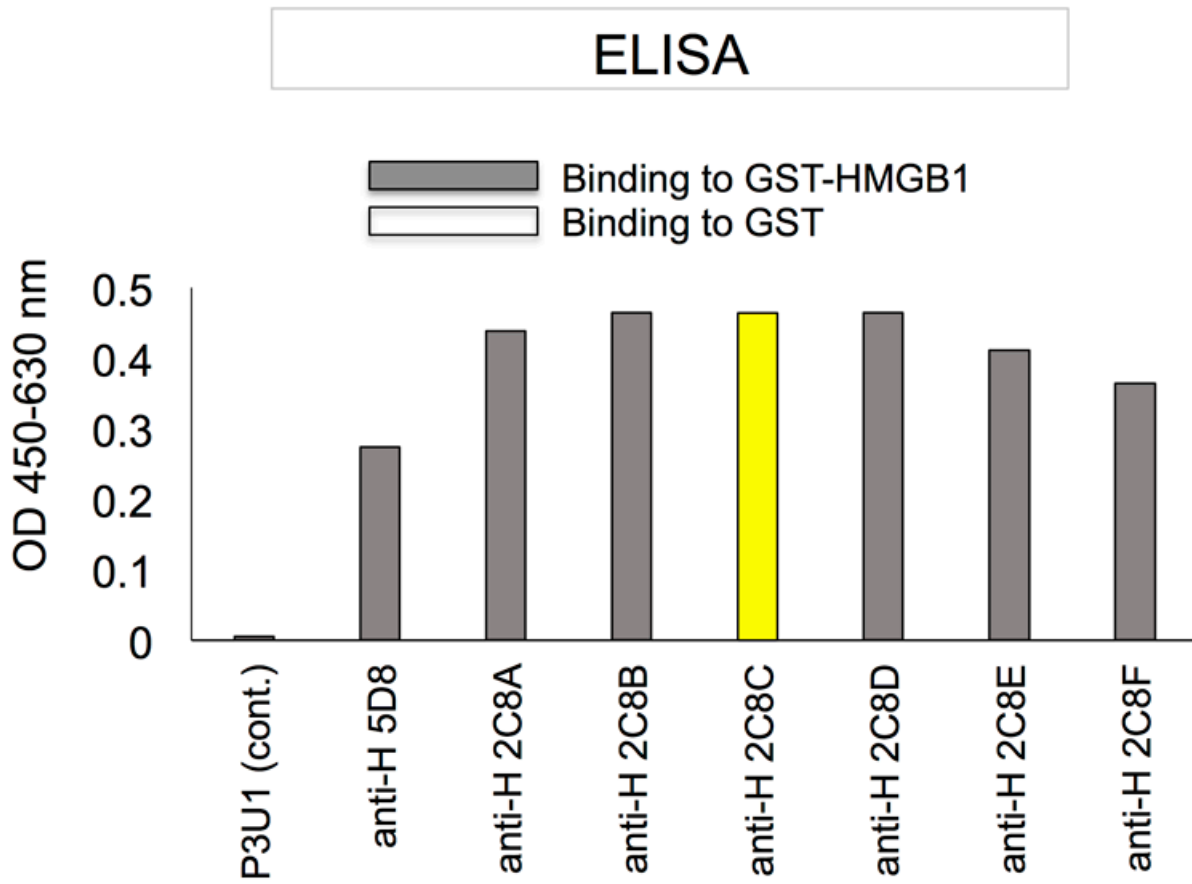

**b**

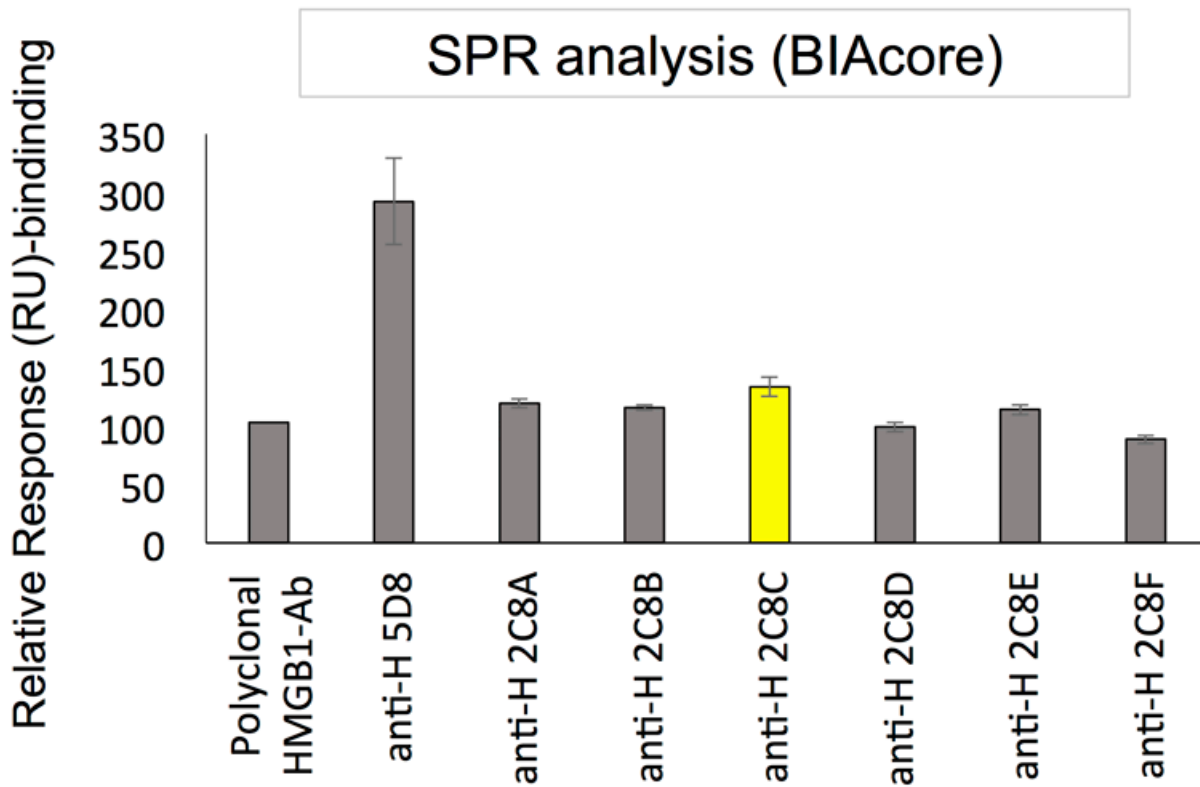

# Supplementary Figure 13

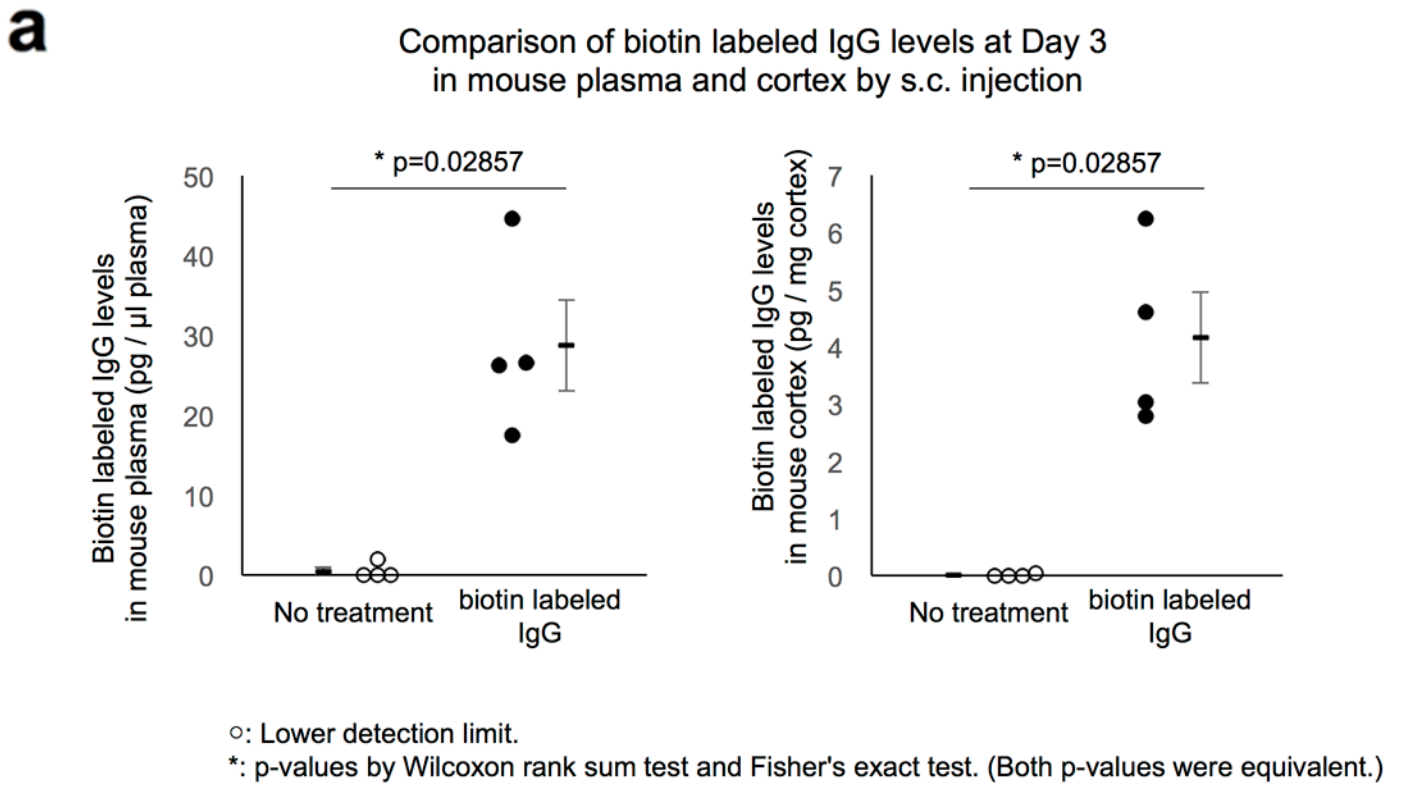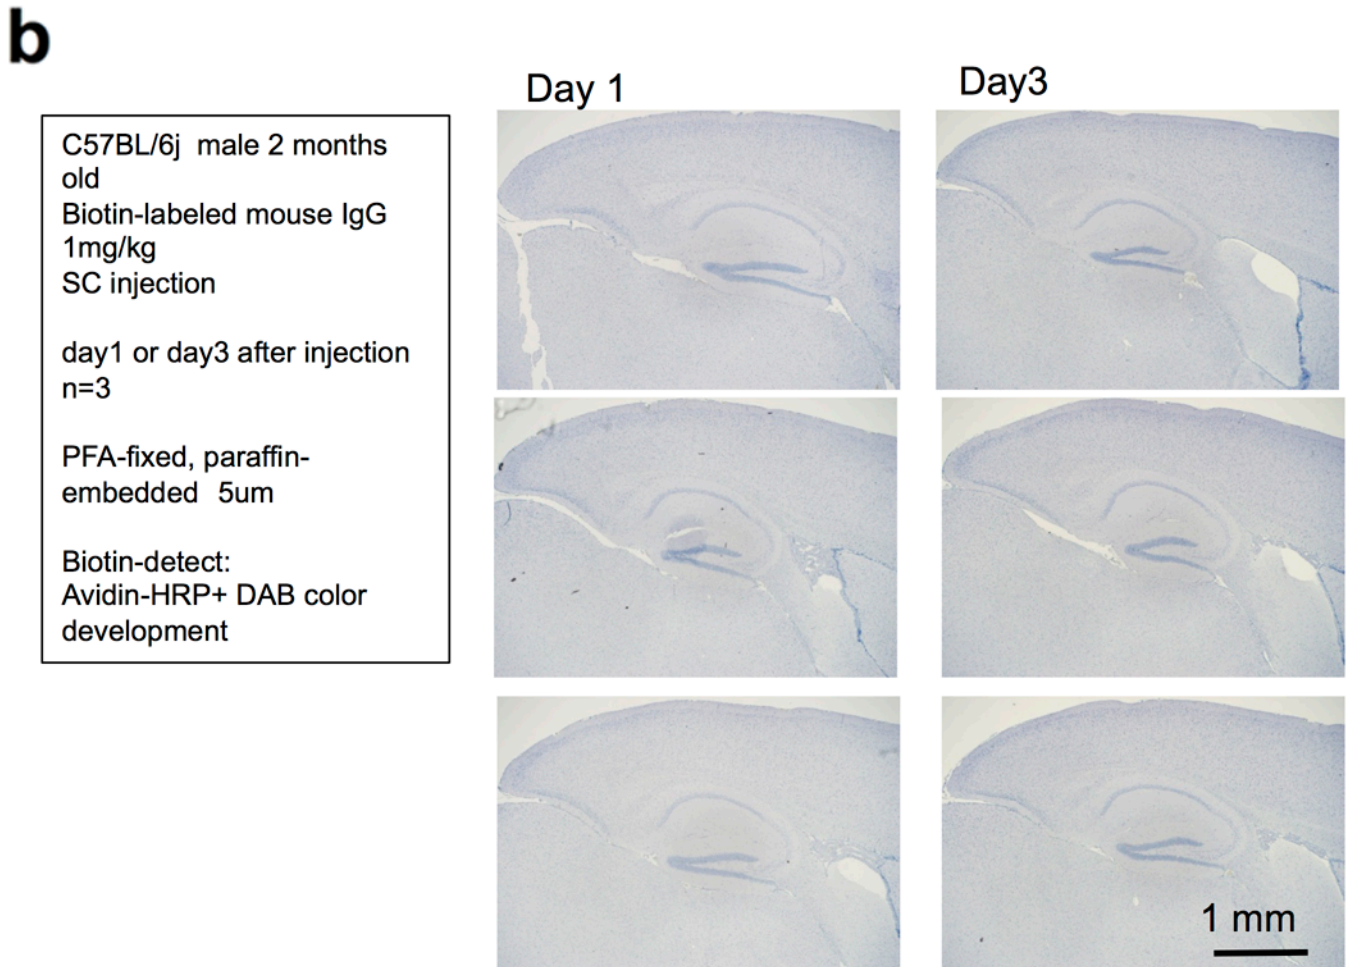





# Supplementary Figure 15

**a**

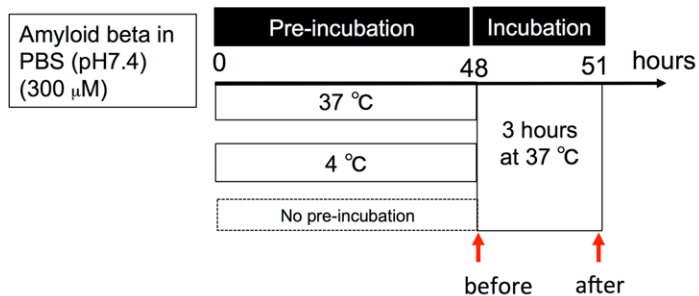

**b**

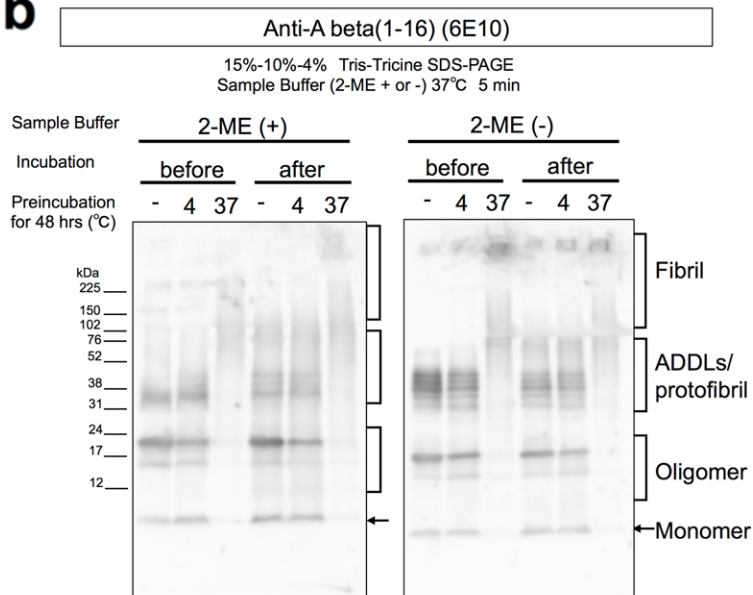

**c**

300 $\mu$ M A $\beta$   
Fixed with 1x volume of 4% glutaric aldehyde  
Negative stain with acetate uranium  
TEM observation

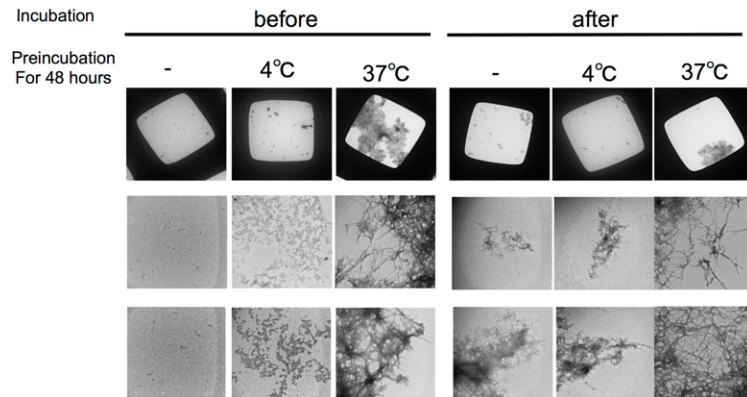

# Supplementary Figure 16

Effect of HMGB1/anti-HMGB1-Ab on A $\beta$ -aggregation *in vitro*

Sample buffer: 3%SDS, 37°C 5min Gel: 0.036% SDS

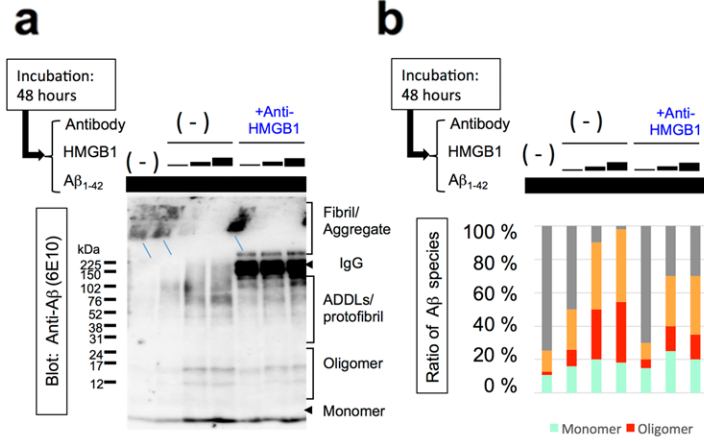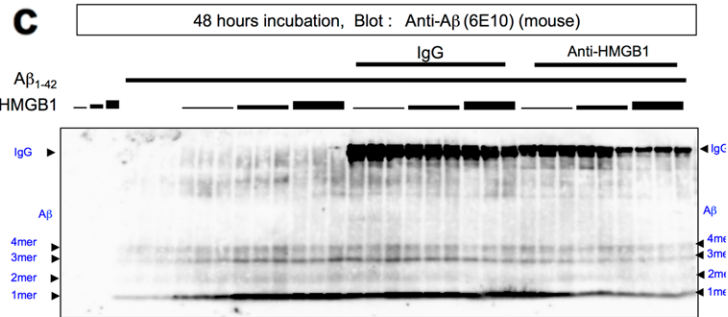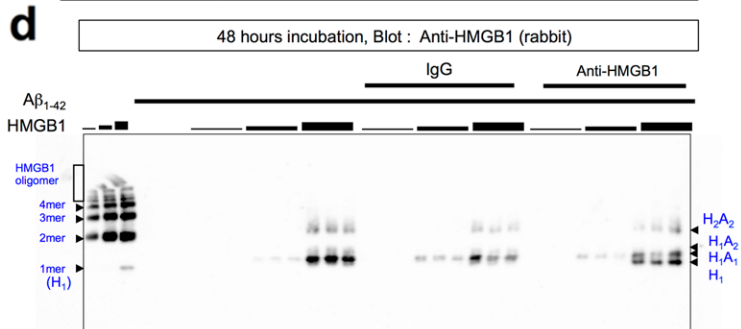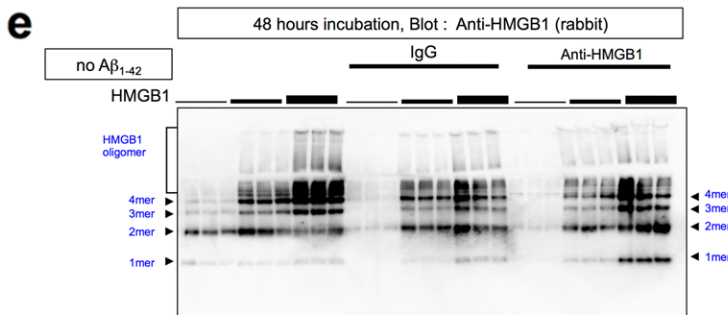

**f**

Effect of HMGB1/anti-HMGB1-Ab on A $\beta$ -aggregation *in vitro*

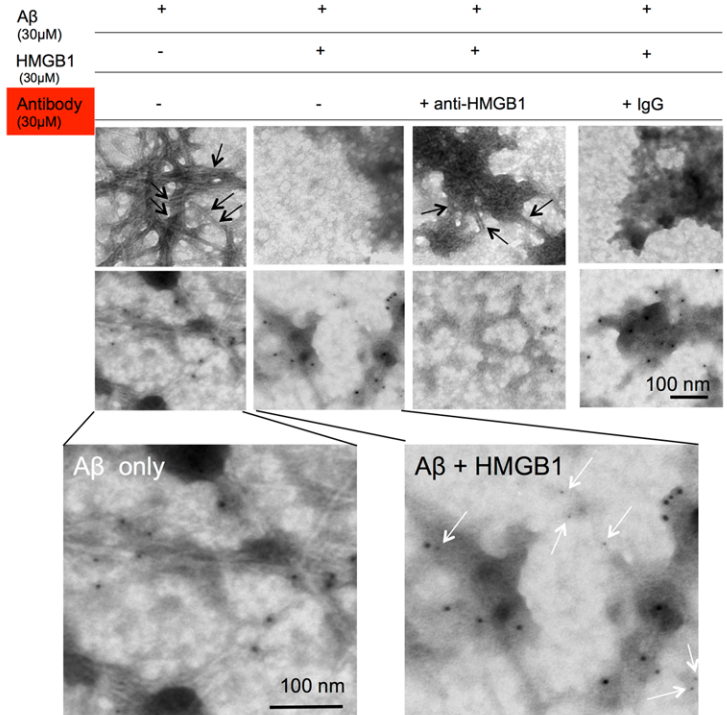

1<sup>st</sup> Ab  
anti-A $\beta$  (6E10, mouse)  
anti-HMGB1 (rabbit)

2<sup>nd</sup> Ab (Gold particle conjugates)  
anti-mouse IgG (10nm Gold) for A $\beta$   
anti-Rabbit IgG (5nm Gold) for HMGB1

# Supplementary Figure 17

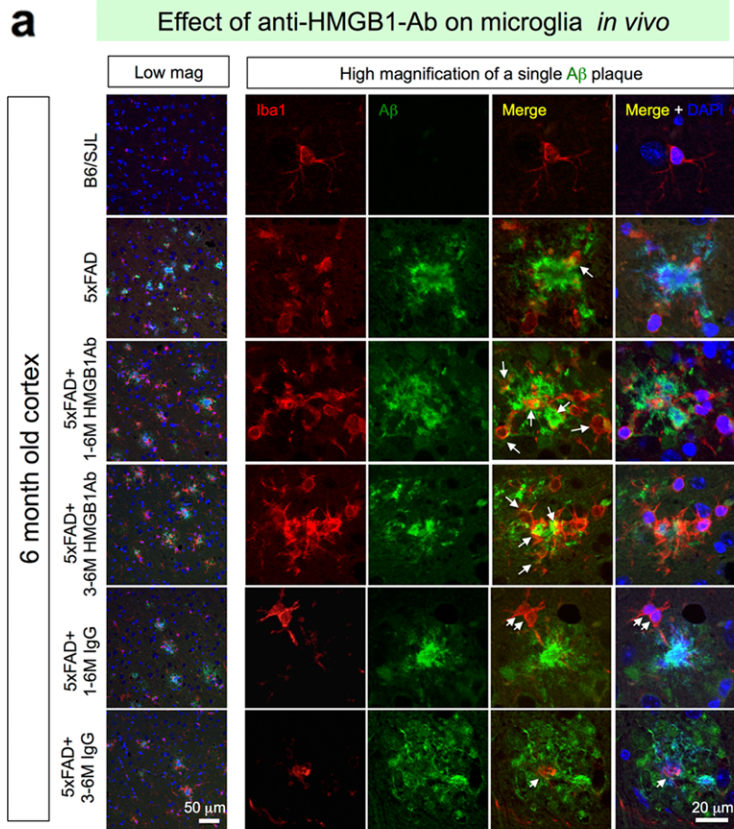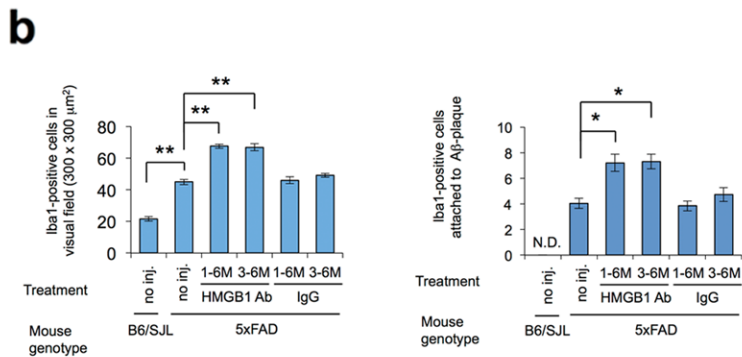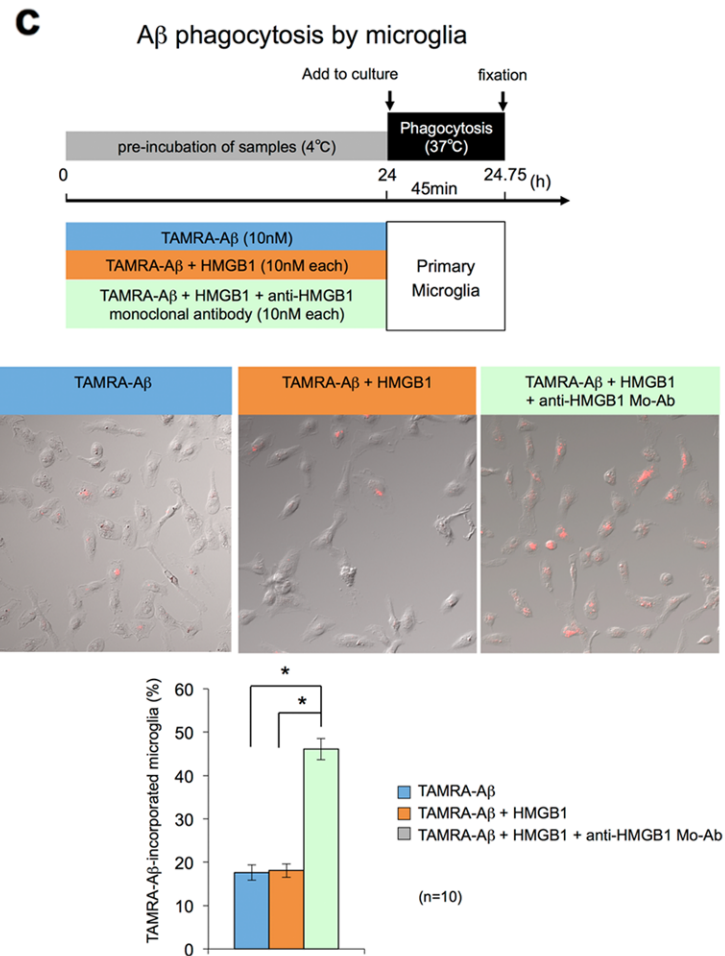

# Supplementary Figure 18

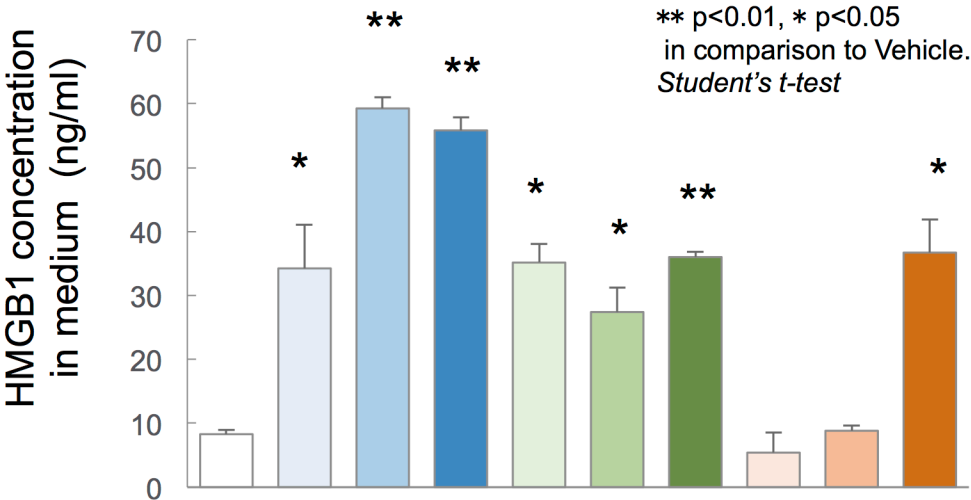

Aβ species and conc. used for stimulation of HMGB1 release

Vehicle      1    3    10      1    3    10      1    3    10      μM  
                 Monomer      Oligomer      Fibril

# Supplementary Figure 19

**a**

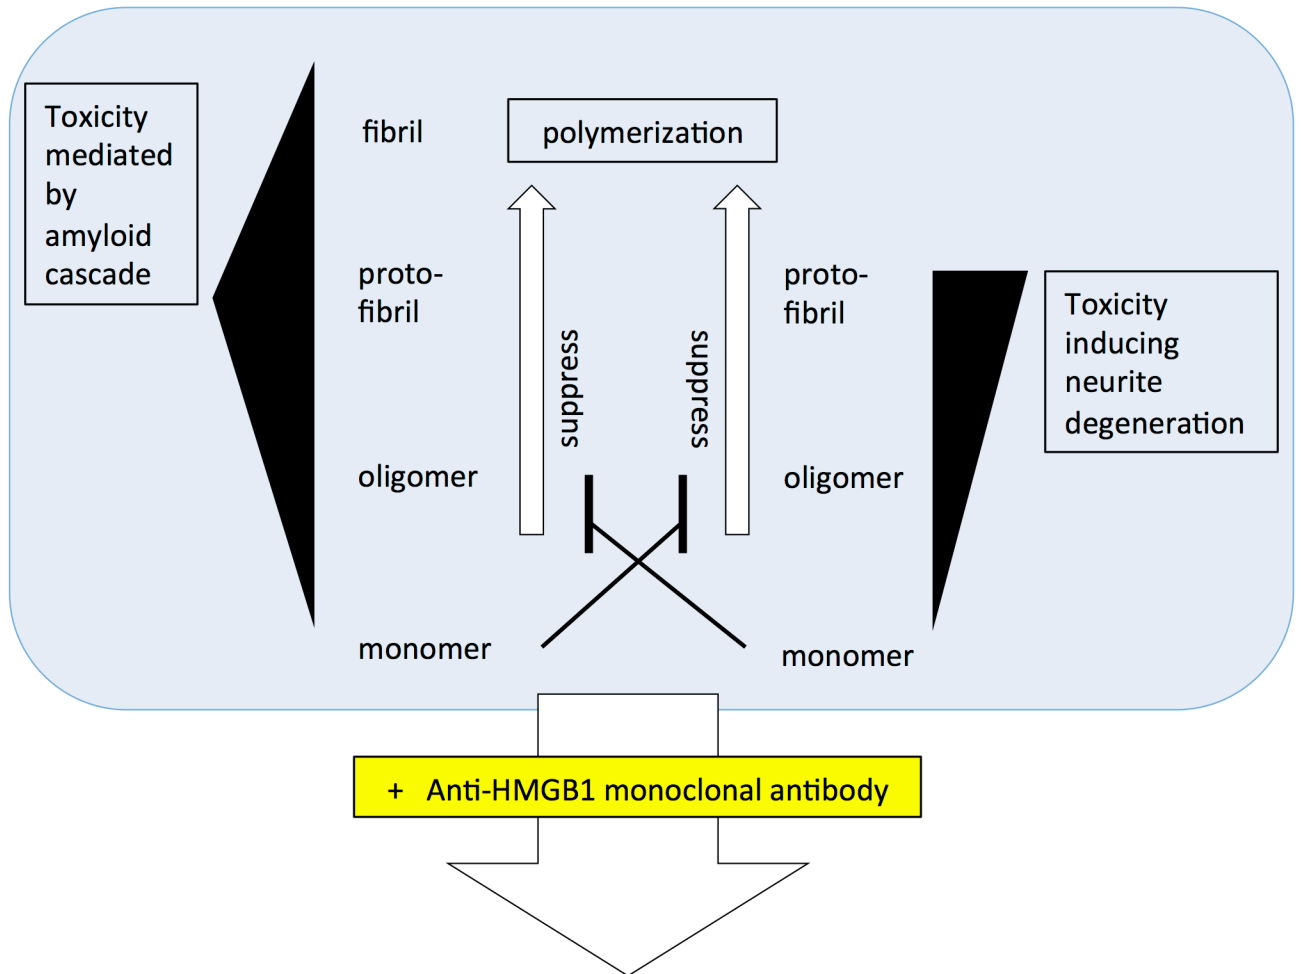

**b**

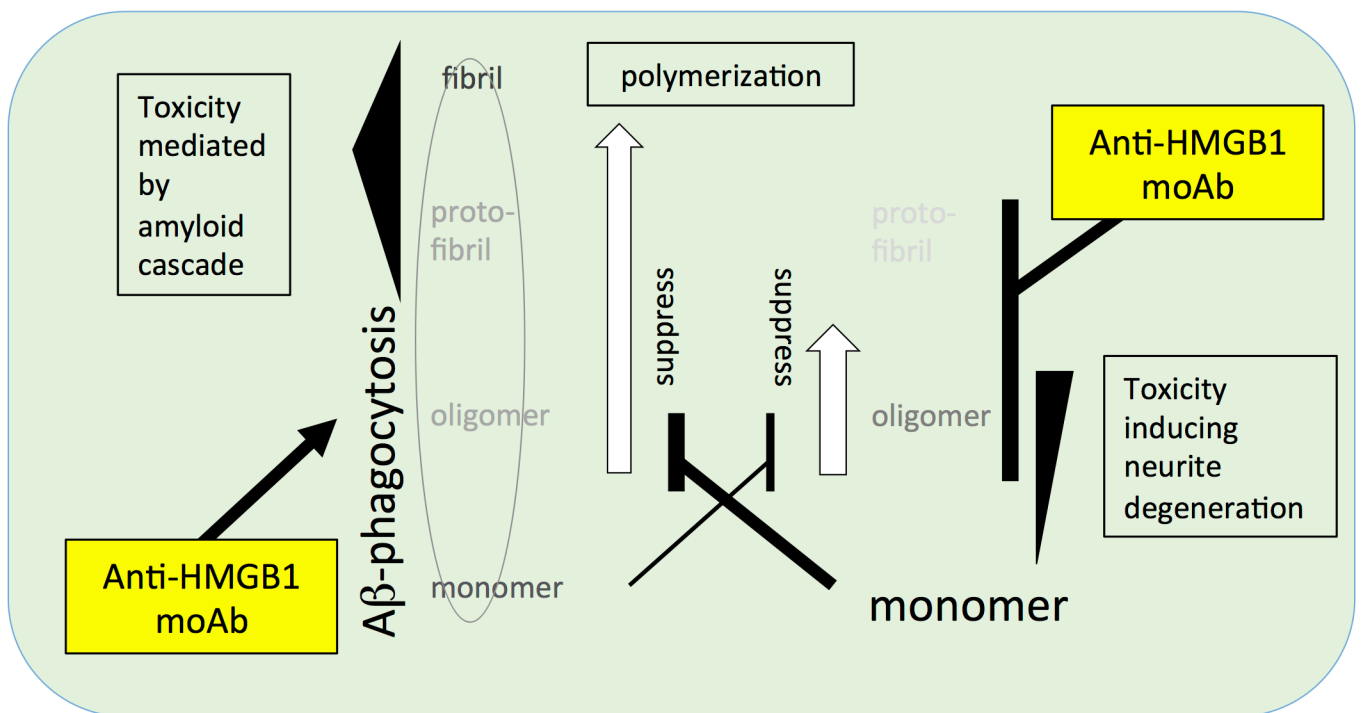

Supplement: srep31895-s1.pdf [file srep31895-s1.pdf]
